# Supplementary material for: In Situ Coupling Carbon Defective C3N5 Nanosheet with Ag2CO3 for Effective Degradation of Methylene Blue and Tetracycline Hydrochloride
Source: Nanomaterials (Basel). 2022 Aug 5;12(15):2701. doi: 10.3390/nano12152701 (PMC9370685; doi:10.3390/nano12152701)
Supplement: Supplementary file 1 [file nanomaterials-12-02701-s001.zip › nanomaterials-1835993-supplementary.pdf]

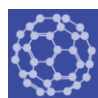

Supporting Information

# In Situ Coupling Carbon Defective $C_3N_5$ Nanosheet with $Ag_2CO_3$ for Effective Degradation of Methylene Blue and Tetracycline Hydrochloride

Guoyu Li <sup>1</sup>, Genying Zeng <sup>1</sup>, Zhangkai Chen <sup>1</sup>, Jiaming Hong <sup>1</sup>, Xiaodong Ji <sup>1</sup>, Zhiqiang Lan <sup>1</sup>, Xiaofei Tan <sup>2,3</sup>, Meifang Li <sup>1</sup>, Xinjiang Hu <sup>1,\*</sup> and Chunfang Tang <sup>1,\*</sup>

<sup>1</sup> College of Environmental Science and Engineering, Central South University of Forestry and Technology, Changsha 410004, China

<sup>2</sup> College of Environmental Science and Engineering, Hunan University, Changsha 410082, China

<sup>3</sup> Key Laboratory of Environmental Biology and Pollution Control, Hunan University, Ministry of Education, Changsha 410082, China

\* Correspondence: xjhu@csuft.edu.cn (X.H.); cshntcf@163.com (C.T.)

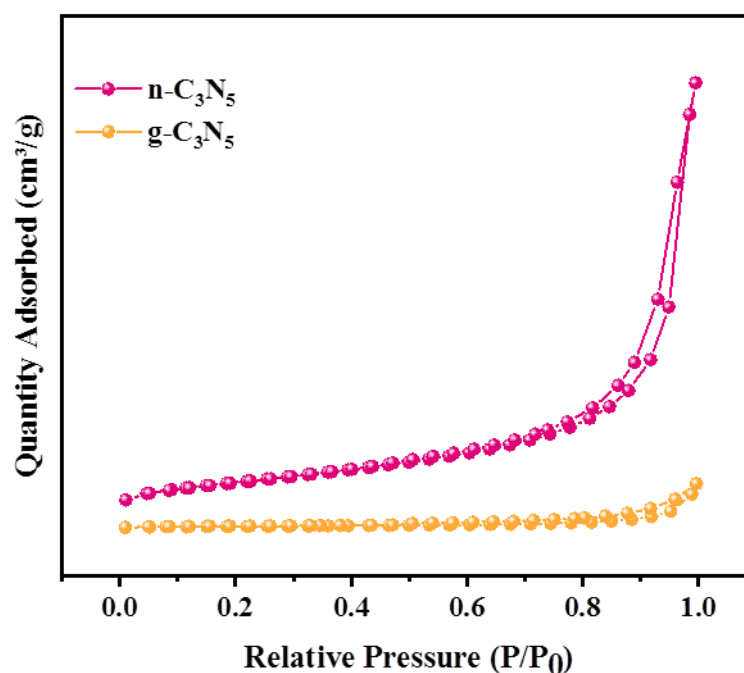

Figure S1. The  $N_2$  adsorption-desorption isotherms of  $g-C_3N_5$  and  $n-C_3N_5$ .

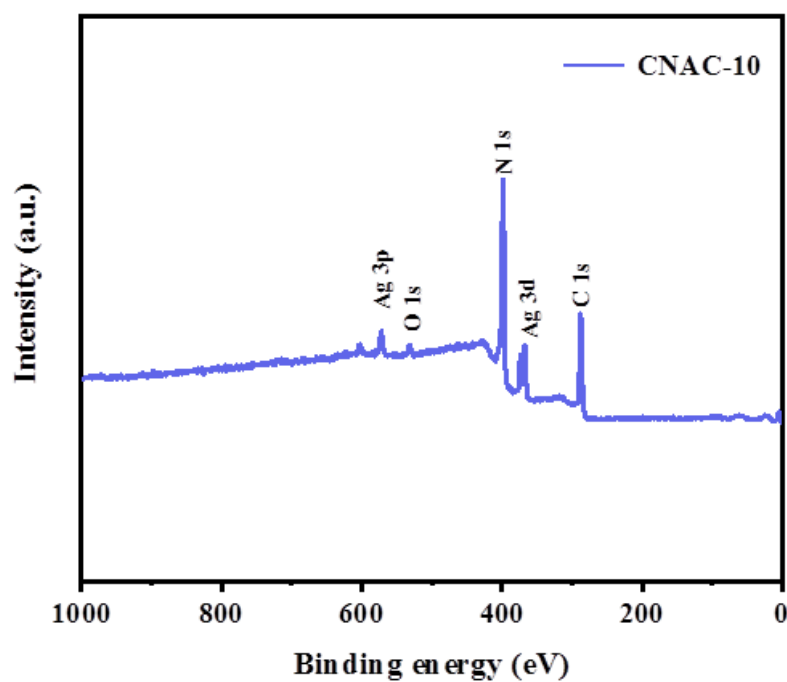

Figure S2. the XPS measurement spectra of the CNAC-10 composite.

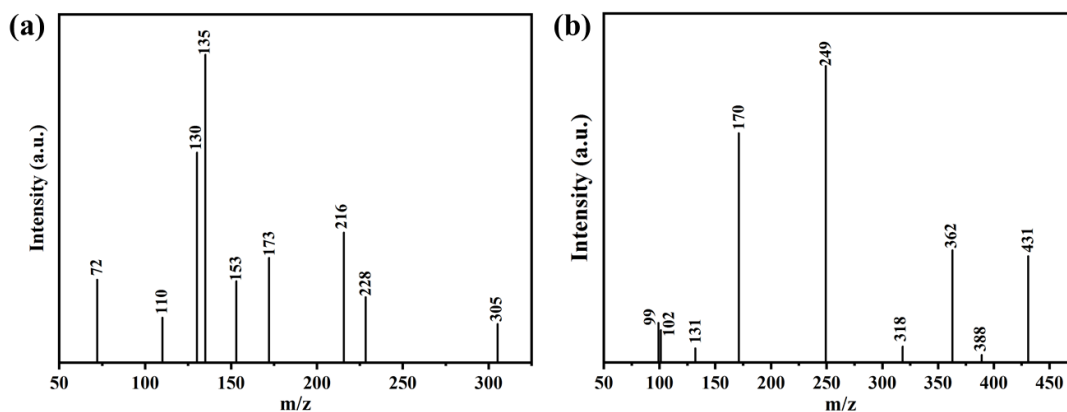

Figure S3. (a)  $m/z$  values of MB photodegradation at 90 min in the presence of CNAC-10 catalyst, (b)  $m/z$  values of TC-HCl photodegradation at 40 min in the presence of CNAC-10 catalyst.

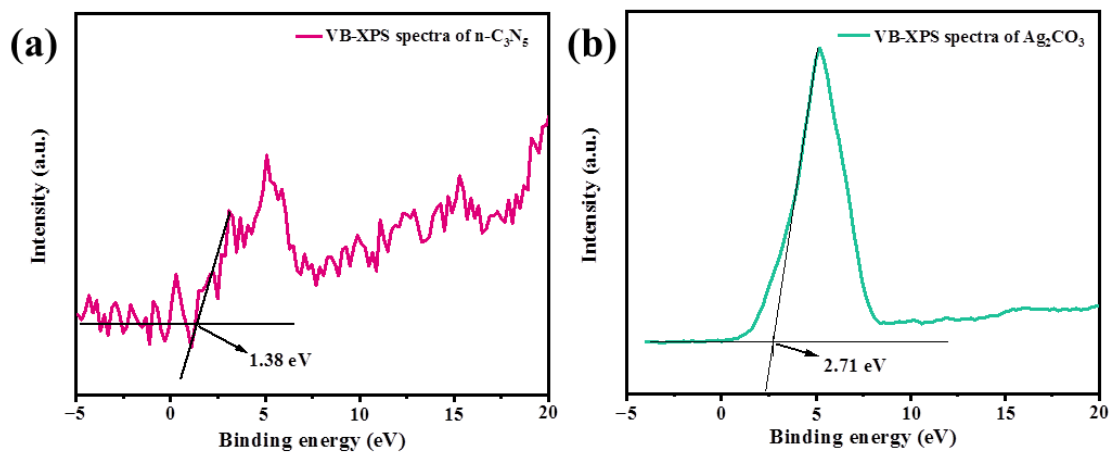

Figure S4. (a,b) The VB-XPS spectra of  $n\text{-C}_3\text{N}_5$  and  $\text{Ag}_2\text{CO}_3$ , respectively.

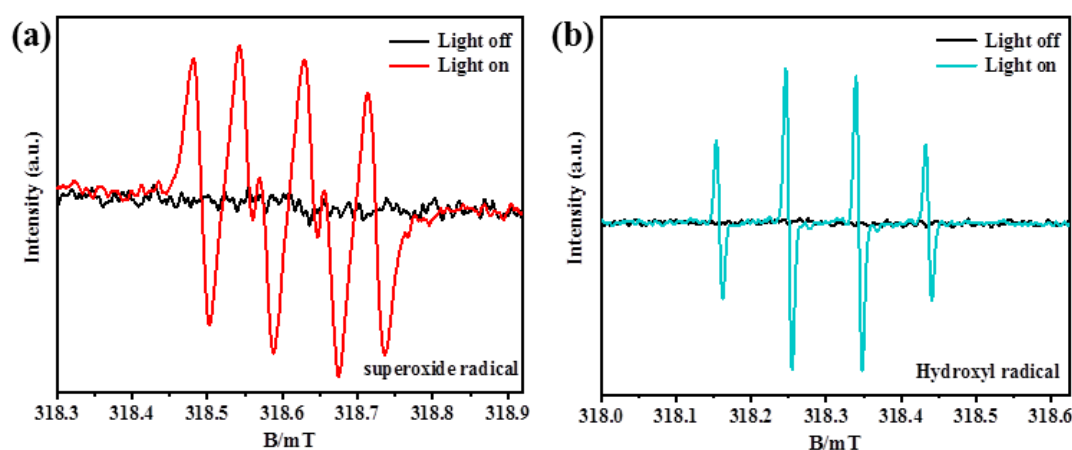

Figure S5. ESR signals of (a)  $\bullet\text{O}_2^-$  and (b)  $\bullet\text{OH}$  generated by CNAC-10.

Table S1. Comparison of the photocatalytic performance of photocatalyst composites.

| photocatalyst                                                    | Contaminants   | Photodegradation rate | Concentration of photocatalyst ( $\text{g}\cdot\text{L}^{-1}$ ) | Ref.      |
|------------------------------------------------------------------|----------------|-----------------------|-----------------------------------------------------------------|-----------|
| n-C <sub>3</sub> N <sub>5</sub> /Ag <sub>2</sub> CO <sub>3</sub> | MB=60 mg/L     | 96.5% in 90 min       | 1                                                               | This work |
| n-C <sub>3</sub> N <sub>5</sub> /Ag <sub>2</sub> CO <sub>3</sub> | TC-HCl=50 mg/L | 97.6% in 100 min      | 0.4                                                             | This work |
| Bi <sub>2</sub> WO <sub>6</sub> @C <sub>3</sub> N <sub>5</sub>   | TC=20 mg/L     | 92.7% in 60 min       | 0.2                                                             | [1]       |
| AgCl/g-C <sub>3</sub> N <sub>5</sub>                             | RhB=10 mg/L    | 85% in 60 min         | 1                                                               | [2]       |
| Ag <sub>3</sub> PO <sub>4</sub> @g-C <sub>3</sub> N <sub>5</sub> | TC-HCl=20 mg/L | 90.5% in 60 min       | 1                                                               | [3]       |
| Bi <sub>2</sub> WO <sub>6</sub> @g-C <sub>3</sub> N <sub>5</sub> | TC=10 mg/L     | 99.8% in 60 min       | 0.4                                                             | [4]       |
| Ag <sub>2</sub> CO <sub>3</sub> @g-C <sub>3</sub> N <sub>4</sub> | MB=10 mg/L     | 95.0% in 54 min       | 1                                                               | [5]       |

## References:

- [1] Li, S., Cai, M., Liu, Y., Zhang, J., Wang, C., Zang, S., Li, Y., Zhang, P. and Li, X. In situ construction of a C<sub>3</sub>N<sub>5</sub> nanosheet/Bi<sub>2</sub>WO<sub>6</sub> nanodot S-scheme heterojunction with enhanced structural defects for the efficient photocatalytic removal of tetracycline and Cr(vi). *Inorg. Chem. Front.* **2022**, 911, 2479-2497.
- [2] Vadivel, S., Hariganesh, S., Paul, B., Rajendran, S., Habibi-Yangjeh, A., Maruthamani, D. and Kumaravel, M. Synthesis of novel AgCl loaded g-C<sub>3</sub>N<sub>5</sub> with ultrahigh activity as visible light photocatalyst for pollutants degradation. *Chem. Phys. Lett.* **2020**, 738, 136862.
- [3] Yin, H., Cao, Y., Fan, T., Zhang, M., Yao, J., Li, P., Chen, S. and Liu, X. In situ synthesis of Ag<sub>3</sub>PO<sub>4</sub>/C<sub>3</sub>N<sub>5</sub> Z-scheme heterojunctions with enhanced visible-light-responsive photocatalytic performance for antibiotics removal. *Sci. Total. Environ.* **2021**, 754, 141926.
- [4] Saravanakumar, K., Mahes Kumar, V., Yea, Y., Yoon, Y., Muthuraj, V. and Park, C. M. 2D/2D nitrogen-rich graphitic carbon nitride coupled Bi<sub>2</sub>WO<sub>6</sub> S-scheme heterojunction for boosting photodegradation of tetracycline: Influencing factors, intermediates, and insights into the mechanism. *Compos. Part. B Eng.* **2022**, 234, 109726.
- [5] An, W., Sun, K., Hu, J., Cui, W. and Liu, L. The Z-scheme Ag<sub>2</sub>CO<sub>3</sub>@g-C<sub>3</sub>N<sub>4</sub> core-shell structure for increased photoinduced charge separation and stable photocatalytic degradation. *Appl. Surf. Sci.* **2020**, 504, 144345.
